# Supplementary material for: A food web bioaccumulation model for the accumulation of per- and polyfluoroalkyl substances (PFAS) in fish: how important is renal elimination?
Source: PubMed Central journal article supplement (PMC9384792; doi:10.1039/d2em00047d), 2022-05-25
Supplement: EM-024-D2EM00047D-s001.pdf [file EM-024-D2EM00047D-s001.pdf]

**A food web bioaccumulation model for the accumulation of poly- and perfluoroalkyl substances (PFAS) in fish: How important is renal elimination?**

**Supplementary Information**

1 **Section 1. General model description**

2

3 Model code can be accessed at: [https://github.com/SunderlandLab/fish\\_foodweb\\_pfas\\_model](https://github.com/SunderlandLab/fish_foodweb_pfas_model)

4

5 **Table S1. Model equations**

6

| Parameter                     | Description                                                                              | Equation or Value                                 | Units    | Ref    |
|-------------------------------|------------------------------------------------------------------------------------------|---------------------------------------------------|----------|--------|
| $C_{b, fish}$                 | Contaminant concentration in the whole body for fish and invertebrates                   | $\frac{k_1 C_W + k_D C_D}{k_2 + k_E + k_G + k_M}$ | ng/g     | 1      |
| $C_{b, phyto}$                | Contaminant concentration in phytoplankton                                               | $\frac{k_1 C_{WTO} \phi}{k_2 + k_G + k_M}$        | ng/g     | 1      |
| <b>Environmental exposure</b> |                                                                                          |                                                   |          |        |
| $C_W$                         | Contaminant concentration in water (weighted average between overlying and porewater)    | $m_0 \phi C_{WTO} + (1 - m_0) C_{WDP}$            | ng/mL    | 1      |
| $C_{WTO}$                     | Chemical concentration in overlying water                                                | Model input, varies by ecosystem                  | ng/mL    | -      |
| $C_{WDP}$                     | Chemical concentration (dissolved) in sediment porewater                                 | $\frac{C_S}{OCS} \div K_{oc}$                     | ng/mL    | 1      |
| $m_0$                         | Fraction of organism respiration from overlying water                                    | Varies by organism, see Tables S4a and S5a        | unitless | -      |
| $\phi$                        | Chemical fraction in the dissolved phase                                                 | Varies by ecosystem, see Tables S4b and S5b       | unitless | varies |
| $OCS$                         | Organic carbon content in sediment                                                       | Varies by ecosystem, see Table S5b                | kg/L     | varies |
| $D_{oc}$                      | Organic carbon – water partitioning coefficient                                          | Varies by ecosystem, see Table S2                 | L/kg     | varies |
| $C_D$                         | Contaminant concentration in the diet (weighted average between prey items and sediment) | $\sum P_i C_{D,i} + P_d C_S$                      | ng/g     | 1      |
| $C_S$                         | Contaminant concentration in sediment                                                    | Model input, varies by ecosystem                  | ng/g     | -      |
| $P_i$                         | Proportion of diet composed of prey item, i                                              | Varies by food web, see Tables S5c                | unitless | -      |
| $P_d$                         | Proportion of diet composed of sediment                                                  | Varies by food web, see Tables S5c                | unitless | -      |
| Tissue fractions <sup>b</sup> |                                                                                          |                                                   |          |        |

|                            |                                                                    |                                                                                                                                                                                   |      |      |
|----------------------------|--------------------------------------------------------------------|-----------------------------------------------------------------------------------------------------------------------------------------------------------------------------------|------|------|
| $v_{NG}$                   | Neutral lipid fraction in the gut                                  | $\frac{(1 - \varepsilon_N)v_{ND}}{\{(1 - \varepsilon_N)v_{ND} + (1 - \varepsilon_L)v_{LD} + (1 - \varepsilon_P)v_{PD} + (1 - \varepsilon_O)v_{OD} + (1 - \varepsilon_W)v_{WD}\}}$ | --   | 1,a  |
| $v_{LG}$                   | Phospholipid fraction in the gut                                   | $\frac{(1 - \varepsilon_L)v_{LD}}{\{(1 - \varepsilon_N)v_{ND} + (1 - \varepsilon_L)v_{LD} + (1 - \varepsilon_P)v_{PD} + (1 - \varepsilon_O)v_{OD} + (1 - \varepsilon_W)v_{WD}\}}$ | --   | 1,a  |
| $v_{PG}$                   | Binding protein fraction in the gut                                | $\frac{(1 - \varepsilon_P)v_{PD}}{\{(1 - \varepsilon_N)v_{ND} + (1 - \varepsilon_L)v_{LD} + (1 - \varepsilon_P)v_{PD} + (1 - \varepsilon_O)v_{OD} + (1 - \varepsilon_W)v_{WD}\}}$ | --   | 1,a  |
| $v_{OG}$                   | NLOM fraction in the gut                                           | $\frac{(1 - \varepsilon_O)v_{OD}}{\{(1 - \varepsilon_N)v_{ND} + (1 - \varepsilon_L)v_{LD} + (1 - \varepsilon_P)v_{PD} + (1 - \varepsilon_O)v_{OD} + (1 - \varepsilon_W)v_{WD}\}}$ | --   | 1,a  |
| $v_{WG}$                   | Water fraction in the gut                                          | $\frac{(1 - \varepsilon_W)v_{WD}}{\{(1 - \varepsilon_N)v_{ND} + (1 - \varepsilon_L)v_{LD} + (1 - \varepsilon_P)v_{PD} + (1 - \varepsilon_O)v_{OD} + (1 - \varepsilon_W)v_{WD}\}}$ | --   | 1,a  |
| $v_{ND}$                   | Neutral lipid fraction in the diet                                 | $\Sigma P_i v_{NB,i}$                                                                                                                                                             | --   | 1    |
| $v_{LD}$                   | Phospholipid fraction in the diet                                  | $\Sigma P_i v_{LB,i}$                                                                                                                                                             | --   | 1    |
| $v_{PD}$                   | Binding protein fraction in the diet                               | $\Sigma P_i v_{PB,i}$                                                                                                                                                             | --   | 1    |
| $v_{OD}$                   | NLOM fraction in the diet                                          | $\Sigma P_i v_{OB,i}$                                                                                                                                                             | --   | 1    |
| $v_{WD}$                   | Water fraction in the diet                                         | $\Sigma P_i v_{WB,i}$                                                                                                                                                             | --   | 1    |
| <b>Tissue partitioning</b> |                                                                    |                                                                                                                                                                                   |      |      |
| $X_N$                      | Neutral fraction of the compound                                   | $(1 + 10^{pH_i - pK_a})^{-1}$                                                                                                                                                     | --   | 2    |
| $X_I$                      | Ionic fraction of the compound                                     | $1 - X_N$                                                                                                                                                                         | --   | 2    |
| $\log K_{OW,I}$            | Octanol-water partitioning coefficient for the ionic chemical form | $\log K_{OW,N} - 3.1$                                                                                                                                                             | L/kg | 2    |
| $D_{OW}$                   | Octanol-water distribution coefficient                             | $X_N K_{ow,N} + X_I K_{ow,I}$                                                                                                                                                     | L/kg | 2    |
| $\beta$                    | Organic carbon (phytoplankton) or NLOM proportionality constant    | 0.35 (phytoplankton)<br>0.05 (all others)                                                                                                                                         | --   | 1,2  |
| $D_{GW}$                   | Gut-water distribution coefficient <sup>b</sup>                    | $v_{NG}D_{OW} + v_{LG}D_{MW} + v_{PG}K_{PW} + \beta v_{OG}D_{ow} + v_{WG}$                                                                                                        | L/kg | 1, a |
| $D_{BW}$                   | Body-water distribution coefficient <sup>b</sup>                   | $v_{NB}D_{OW} + v_{LB}D_{MW} + v_{PB}D_{PW} + \beta v_{OB}D_{ow} + v_{WB}$                                                                                                        | L/kg | 1, a |

|                                  |                                                                                                        |                                                                                                                     |                 |     |
|----------------------------------|--------------------------------------------------------------------------------------------------------|---------------------------------------------------------------------------------------------------------------------|-----------------|-----|
| $D_{GB}$                         | Gut-body partitioning coefficient                                                                      | $D_{GW} / D_{BW}$                                                                                                   | kg/kg           | 1   |
| <b>Respiration</b>               |                                                                                                        |                                                                                                                     |                 |     |
| $k_{1,phyto}$                    | Uptake rate constant for phytoplankton                                                                 | $(A + \frac{B}{D_{MW}})^{-1}$                                                                                       | L/kg/d          | 1,a |
| $A$                              | Resistance to chemical uptake through the aqueous phase of phytoplankton                               | $6 \times 10^{-5}$                                                                                                  | d               | 1   |
| $B$                              | Resistance to chemical uptake through the organic phase of phytoplankton                               | 5.5                                                                                                                 | d               | 1   |
| $k_{1,fish}$                     | Respiratory (i.e. gill) uptake rate constant for invertebrates and fish                                | $E_W G_V / W_B$                                                                                                     | L/kg/d          | 1   |
| $E_W$                            | Chemical absorption efficiency across the gill membrane (aqueous chemical absorption efficiency)       | $k_{1,empirical} W_B / G_V$ ,<br>where $k_{1,empirical}$ is from ref. 3                                             | unitless        | 3,4 |
| $G_V$                            | Ventilation rate                                                                                       | $1400 W_B^{0.65} / C_{OX}$                                                                                          | L/d             | 1   |
| $k_2$                            | Respiratory elimination rate constant                                                                  | $k_1 / D_{BW}$                                                                                                      | d <sup>-1</sup> | 1   |
| <b>Ingestion / Egestion</b>      |                                                                                                        |                                                                                                                     |                 |     |
| $k_D$                            | Dietary uptake rate constant                                                                           | $E_D G_D / W_B$                                                                                                     | kg/kg/d         | 1   |
| $E_D$                            | Chemical absorption efficiency across the gut membrane (gut or dietary chemical absorption efficiency) | Empirically calculated, see Table 2a                                                                                | unitless        | 5,6 |
| $G_{D,filter}$                   | Feeding rate for filter feeders (invertebrates)                                                        | $G_V C_{SS} \sigma$                                                                                                 | kg/d            | 1   |
| $G_{D,fish}$                     | Feeding rate for coldwater fish                                                                        | $0.022 W_B^{0.85} e^{0.06T}$                                                                                        | kg/d            | 1   |
| $\sigma$                         | Scavenging efficiency of particles absorbed from the water                                             | 1                                                                                                                   | unitless        | 1   |
| $k_E$                            | Fecal elimination rate constant                                                                        | $G_F E_D D_{GB} / W_B$                                                                                              | d <sup>-1</sup> | 1   |
| $G_F$                            | Fecal egestion rate                                                                                    | $\{(1 - \varepsilon_N)v_{ND} + (1 - \varepsilon_L)v_{LD} + (1 - \varepsilon_P)v_{PD} + (1 - \varepsilon_O)v_{OD} +$ | kg/d            | 1,a |
| $k_R$                            | Renal elimination rate constant                                                                        | Calculated, see Section 7                                                                                           | d <sup>-1</sup> | a   |
| <b>Other organism parameters</b> |                                                                                                        |                                                                                                                     |                 |     |
| $k_{G,phyto}$                    | Growth rate constant for phytoplankton                                                                 | $GRF$                                                                                                               | d <sup>-1</sup> | 1   |
| $k_{G,fish}$                     | Growth rate constant for invertebrates and                                                             | $GRF \cdot W_B^{-0.2}$                                                                                              | d <sup>-1</sup> | 1   |

|        |                                                      |                                  |                 |   |
|--------|------------------------------------------------------|----------------------------------|-----------------|---|
|        | fish                                                 |                                  |                 |   |
| GRF    | Growth rate factor                                   | Constant, see Tables S4a and S5a | varies          | - |
| $k_M$  | Metabolic elimination rate through biotransformation | 0                                | d <sup>-1</sup> | - |
| $pH_i$ | Organism internal pH                                 | 7.4                              | unitless        | 2 |

7 a – This study

8 b – See Sections 4 and 5 for individual parameter values

9

10

11 Section 2. PFAA parameters

12

13 Table S2. PFAA parameters

14

|                                 | C6 PFSA                | C8 PFSA                | C8 PFCA                | C9 PFCA                | C10 PFCA               | C11 PFCA                | Reference                                     |
|---------------------------------|------------------------|------------------------|------------------------|------------------------|------------------------|-------------------------|-----------------------------------------------|
| <i>pKa</i>                      | 0                      | 0                      | 1                      | 1                      | 1                      | 1                       | 2                                             |
| Partitioning Coefficients       |                        |                        |                        |                        |                        |                         |                                               |
| $\log K_{OW,N}$                 | 5.20                   | 6.43                   | 5.30                   | 5.92                   | 6.50                   | 7.15                    | COSMOtherm 2011, following ref 2 <sup>a</sup> |
| $\log D_{OW}$                   | 2.10                   | 3.33                   | 2.20                   | 2.82                   | 3.40                   | 4.05                    | Calculated from $K_{OW,N}$ , following ref 2  |
| $\log D_{MW}$                   | 3.82                   | 4.88                   | 3.51                   | 4.04                   | 4.63                   | 5.22 <sup>b</sup>       | 7                                             |
| $\log D_{PW}$                   | 4.94                   | 4.81                   | 4.33                   | 4.46                   | 4.86                   | 4.74                    | Allendorf et al. 2019 <sup>c</sup>            |
| $\log D_{OC, estuarine}^d$      | 3.70                   | 4.34                   | 4.05                   | 4.38                   | 4.58                   | 4.99                    | Munoz et al. 2017                             |
| Chemical transfer efficiencies  |                        |                        |                        |                        |                        |                         |                                               |
| <i>E<sub>W, empirical</sub></i> | 7.9 x 10 <sup>-4</sup> | 6.8 x 10 <sup>-2</sup> | 6.8 x 10 <sup>-4</sup> | 4.9 x 10 <sup>-3</sup> | 3.7 x 10 <sup>-2</sup> | 1.53 x 10 <sup>-1</sup> | 3 <sup>e</sup>                                |
| <i>E<sub>D, juv</sub></i>       | 0.7                    | 1                      | 0.59                   | 1                      | 1                      | 1                       | 5                                             |
| <i>E<sub>D, adult</sub></i>     | 0.558                  | 0.721                  | 0.138                  | 0.522                  | 0.65                   | 0.75                    | 6 <sup>f</sup>                                |

15 a – Dry basis, see Table S5a  $\log K_{OW,N}$

16 b – Empirical data is not available for PFUA. Droge found consistent increases in  $D_{MW}$  of log unit 0.59 increments for each additional  
 17 fluorinated carbon, which was used to estimate a value for  $D_{MW}$  for PFUA. For further discussion of  $D_{MW}$  parameter selection, see  
 18 Table S3a.

19 c – Partitioning coefficient assumes a protein density of 1.36 kg/L to convert from units of kg/L to L/L.

20 d – Empirical values from the same or similar study site should be used whenever possible.

21 e – Values were calculated based on calculation from reported uptake rate, assuming a fish weight of 7g and oxygen concentration  
 22 of 7.23 mg/L. The italicized value was estimated from an uptake rate that was estimated from a log-linear regression between chain  
 23 length and uptake rate.

24 f– Italicized values are extrapolated based on approximate chain-length patterns. In the current study,  $E_{D, juv}$  is used to parameterize  
 25 the BCF and BMF model applications, while  $E_{D, adult}$  is used to parameterize the food web model application.

26

27  
28  
29  
30  
31  
32  
33  
34  
35  
36  
37  
38  
39  
40  
41  
42  
43  
44  
45  
46  
47  
48  
49  
50  
51

### Section 3. Selection of key PFAA parameters

Revisions to the partitioning and chemical transfer efficiency parameters in the Armitage et al.<sup>2</sup> fish bioconcentration model, made to improve applicability to food web bioaccumulation of PFAAs, are discussed below. In Tables S3a-b, rows highlighted in grey represent parameter values used in the current model.

#### Tissue partitioning

In this model, the body-water partitioning coefficient ( $D_{BW}$ ) parameter used by Armitage et al.<sup>2</sup> was updated (1) to revise the parameterization of phospholipid partitioning and (2) to include partitioning to blood plasma binding proteins.

*Phospholipids* -- Partitioning to phospholipids is described by the membrane-water partitioning coefficient  $D_{MW}$ . In this model,  $D_{MW}$  is parameterized using empirical values from a laboratory-based partitioning study using solid-supported phosphatidylcholine lipid bilayer membranes designed to mimic intestinal epithelium<sup>7</sup>. Similar  $D_{MW}$  values were measured in a second laboratory study for all PFAAs except the C11 PFCA, for which the measured  $D_{MW}$  was lower than the C10 PFCA<sup>4</sup>. However, the second study was inconclusive as to whether this was due to the lower diffusibility of larger compounds or experimental error, and therefore this experimental value is not used in the current study. Empirically measured  $D_{MW}$  values are also similar to those calculated by the mechanism proposed in the ionogenic model, when based on Kow estimates from COSMOtherm (2011), suggesting that these modeled  $D_{MW}$  values may be reasonable approximations for compounds without empirical  $D_{MW}$  measurements (see Table S3a).

Following Armitage et al.<sup>2</sup>, the volume fraction of phospholipids ( $U_{LB}$ ) is estimated at 1% in fish. In this study,  $U_{LB}$  is approximated at 1% in all other organisms as well, although it is likely that  $U_{LB}$  may be more variable in lower trophic level organisms, particularly phytoplankton.

52 **Table S3a. Log D<sub>m,w</sub>**

53

| Data Source                                                           | C6 PFSA     | C8 PFSA     | C8 PFCA     | C9 PFCA     | C10 PFCA    | C11 PFCA                |
|-----------------------------------------------------------------------|-------------|-------------|-------------|-------------|-------------|-------------------------|
| <i>Empirical</i>                                                      |             |             |             |             |             |                         |
| <b>Droge 2019<sup>7</sup></b>                                         | <b>3.82</b> | <b>4.88</b> | <b>3.51</b> | <b>4.04</b> | <b>4.63</b> | <b>5.22<sup>a</sup></b> |
| Ebert et al. 2020 <sup>4</sup>                                        | 4.13        | 4.89        | 3.52        | 4.25        | 4.82        | 4.54 <sup>b</sup>       |
| <i>Calculated from Kow following Armitage et al. 2013<sup>2</sup></i> |             |             |             |             |             |                         |
| COSMOtherm 2011                                                       | 3.37        | 4.61        | 3.47        | 4.10        | 4.69        | 5.34                    |
| KowWIN 1.68                                                           | 1.31        | 2.65        | 2.98        | 3.65        | 4.33        | 5.01                    |
| Arp, Niedler & Goss                                                   | --          | 3.47        | 1.76        | 2.67        | 3.57        | 4.58                    |

54 a – Value is extrapolated based on chain-length pattern for PFCAs

55 b – Value does not follow chain-length patterns.

56

57 *Albumin proteins* - PFAA binding to albumin is widely believed to drive high concentrations observed in blood plasma, and  
58 has been measured with human and bovine serum albumin. Albumin binding patterns show significant species-specific variation<sup>8</sup>,  
59 but PFAA partitioning coefficients have not been measured for any fish-specific proteins. Available binding and partitioning studies  
60 using bovine serum albumin (BSA) and human serum albumin (HSA) have shown widely variable results due to a diversity of  
61 measurement methods, including poor standardization of ligand (i.e. chemical) and receptor (i.e. protein) concentrations used  
62 during measurement<sup>8</sup>. The three available albumin partitioning studies show contrasting patterns for headgroup and PFCA chain  
63 length partitioning to BSA. Bischel et al.<sup>9</sup> reported decreasing partitioning strength with increasing chain length for the C8-C12  
64 PFCAs, and nearly identical partitioning coefficients for identical chain length PFCAs and PFSA, whereas Allendorf et al.<sup>10</sup> and Aleiso  
65 et al.<sup>11</sup> found increasing partitioning strength with increasing chain length, and greater chain-length dependence for PFCAs  
66 compared to PFSA (Table S3b). Allendorf et al.<sup>10</sup> attributed discrepancies to differences in study design: all studies used equilibrium  
67 dialysis, but Bischel et al.<sup>9</sup> conducted their experiment at a higher PFAA:albumin molar ratios, such that over 98% of PFAAs were  
68 bound at equilibrium, which can in turn lead to oversaturation of protein binding sites that leads to an underestimation of true



69 partitioning strength. The pattern observed by Allendorf et al.<sup>10</sup> also align more closely with patterns of fish blood protein binding  
 70 strength measured by Zhong et al.<sup>12</sup> in carp, as well as overall patterns of bioconcentration and biomagnification observed in  
 71 laboratory studies of fish<sup>3,5</sup>, in which accumulation or partitioning is stronger for PFSA compared to PFCA of the same chain length.  
 72 We use values from Allendorf et al.<sup>10</sup> in this model.

73 The presence and abundance of albumin proteins in fish can be highly variable, with albumin making up anywhere from 0 to  
 74 60% of total blood proteins in different species<sup>13,14</sup>. The volume fraction of albumin binding proteins is estimated to range between  
 75 0 to 0.4% in fish (SI Section 7) based on literature values for albumin or albumin-like protein concentrations and tissue volumes  
 76 estimated for an average fish. In this model, the volume fraction of albumin or albumin-like binding proteins is set at 0.3% for fish,  
 77 0.1% for invertebrates, and 0% in phytoplankton.

78

79 **Table S3b. Log Dpw**

| Data Source                        | C6 PFSA | C8 PFSA | C8 PFCA | C9 PFCA | C10 PFCA | C11 PFCA |
|------------------------------------|---------|---------|---------|---------|----------|----------|
| Allendorf et al. 2020 <sup>a</sup> | 4.94    | 4.81    | 4.33    | 4.46    | 4.86     | 4.74     |
| Bischel et al. 2011                | 4.3     | 4.1     | 4.14    | 4.05    | 3.86     | 3.7      |
| Alesio et al. 2022                 | 5.05    | 5.53    | 4.82    | 5.93    | 6.10     | --       |

80 a – Partitioning coefficient assumes a protein density of 1.36 kg/L to convert from units of kg/L to L/L.

81

82 *Liver fatty acid binding proteins* - PFAAs have also been shown to bind to liver- and other fatty-acid binding proteins, which  
 83 are considered to be drivers of elevated PFAA concentrations in the liver and kidney. The pattern of human L-FABP binding strength  
 84 across PFAA structures is similar to the pattern observed for fish blood proteins, with higher binding affinities for PFSA compared to  
 85 PFCA of the same chain length, and increasing binding affinities with chain length for the C4 to C8 PFSA and C7 to C11 PFCA<sup>12,15</sup>.  
 86 No partitioning coefficients have been measured for any L-FABP, and no published studies have measured PFAA binding to L-FABP in  
 87 fish species, but lower binding strengths have been reported for human L-FABP compared to albumin<sup>8,11,15,16</sup>. The relative  
 88 abundance of L-FABP is also substantially lower than that of albumin<sup>17</sup>. We estimate that the contribution of L-FABP to total PFAA  
 89 binding is not larger than uncertainties in albumin binding strength and abundance (Section 7). Therefore, L-FABP and other  
 90 potential binding proteins are not explicitly included in this model.

91 *Neutral storage lipids and NLOM* -- Binding to neutral storage lipids and NLOM is described following Armitage et al.<sup>2</sup>, using  
92 the octanol-water distribution coefficient ( $D_{ow}$ ).  $D_{ow}$  in the default model is calculated from Kow estimated with COSMOtherm  
93 (2011).

94  
95 Chemical absorption efficiencies

96 *Branchial uptake and elimination* – Membrane transport of ionized compounds is generally significantly reduced compared  
97 to that of neutral POPs, with transport dominated by the neutral fraction of the compound. For weakly ionized compounds, diffusive  
98 transport by the neutral chemical fraction results in pH-dependent transport rates. However, for highly ionized compounds, the  
99 relative importance of other transport mechanisms, such as paracellular transport, protein-mediated or ion channel transport, or  
100 mass transfer of the ionic fraction, are hypothesized to increase as the size of the neutral chemical fraction grows negligibly small.  
101 Saarikoski et al.<sup>18</sup> found that for highly ionized compounds, as pH increases chemical uptake initially decreases but then plateaus.  
102 Armitage et al.<sup>2</sup> updated the Arnot & Gobas<sup>1</sup> submodel for aqueous chemical transfer efficiency ( $E_w$ ) for ionic chemicals to reflect  
103 these behaviors by (1) modeling the pH-dependence of diffusive transport and (2) adding a constant to crudely account for non-  
104 diffusive transport pathways, which increase in importance as diffusive transport rates decrease for highly ionized compounds.

105 In a series of membrane permeability experiments using phosphatidylcholine liposomes, Ebert et al.<sup>4</sup> found *in vitro* lipid  
106 bilayer membrane permeabilities to be consistent with pH-independent passive transport for PFSA, and only weakly pH-dependent  
107 passive transport for PFCAs. For PFSA, the effective permeability of the ionic fraction is about eight orders of magnitude greater  
108 than that of the neutral fraction. The empirically measured permeabilities matched permeabilities calculated from cellular uptake  
109 studies quite well, suggesting they reasonably represented real behaviors in cells<sup>4,17</sup>. Model-predicted permeabilities using either  
110 correlation with the hexadecane-water partitioning coefficient or COSMOtherm similarly suggest that permeability of the ionic  
111 fraction of PFSA is orders of magnitude greater than the effective neutral permeability at biological pH. The authors attributed  
112 greater permeability of the ionic fraction of PFSA compared to PFCAs (SI Tables 3.2.1, 3.2.7; Figures 3.2.2-3)<sup>4</sup> to the broader surface  
113 charge distribution in the sulfonate compared to the carbonate headgroup, resulting in lower surface charge densities and lower  
114 resistance to transport through the neutral interior of the bilayer membrane. This indicates pH-independent membrane transport, as  
115 PFSA are predominantly in their ionic form at environmental pH.

116 For PFCAs, both the neutral and ionic chemical fractions play a role in transport, with up to an order of magnitude difference  
117 between the effective membrane permeability for the neutral and ionic fractions. This suggests that pH-dependent transport of the  
118 neutral chemical fraction may play a larger role for PFCAs, but at much lower rates than expected based on models developed for  
119 more weakly ionized compounds<sup>2</sup>. While the Armitage et al.<sup>2</sup> model predicts a two order of magnitude difference in permeability for  
120 PFCAs between pH 6 and 8, Ebert et al.<sup>4</sup> estimated a variability of only about 30%, based on passive uptake rates measured *in vitro*

121 in human HEK293 cells<sup>19</sup>. Here we approximate membrane transport of all PFAAs with a pH-independent parameterization of  
122 membrane transport at environmentally relevant pH.

123 The  $E_W$  parameter is estimated from branchial uptake rates from lab bioconcentration studies based on the modeled  
124 relationship between these values and gill ventilation rate (see Table S1).  $E_W$  values calculated from the Martin et al.<sup>3</sup>  
125 bioconcentration study were based on reported uptake rates and gill ventilation rates calculated based on a reported average fish  
126 weight of 7.3g and an estimated oxygen concentration of 10 mg/L (92% dissolved oxygen saturation at 12 °C). The uptake rate for  
127 the C9 PFCA was not directly measured, and was therefore instead interpolated from a linear regression between uptake rate and  
128 PFCA chain length. For the current model,  $E_W$  calculated from the laboratory bioconcentration study is directly used in all model  
129 applications based on an assumption that aqueous chemical transfer efficiency does not vary substantially with pH and therefore is  
130 comparable between all study conditions. In general, the empirically estimated  $E_W$  values follow membrane permeability patterns  
131 observed in other literature, showing that total permeability is greater for PFSAAs than PFCAs, and that permeability increases with  
132 chain length (studies cited in Ng & Hungerbuhler<sup>17</sup>, Ebert et al.<sup>4</sup>).

133

134 *Gut uptake and elimination* – Gut membrane chemical transfer efficiencies ( $E_D$ , also referred to as absorption or chemical  
135 assimilation efficiencies) are generally not observed to be significantly different for ionogenic chemicals compared to neutral  
136 chemicals, due to the long residence time of chemicals in the gut that enables a longer period for transport to occur compared to gill  
137 membrane transport<sup>20</sup>. However, the submodel for dietary absorption efficiencies in the bioaccumulation model for neutral organic  
138 chemicals is based on an inverse relationship between absorption efficiency and hydrophobicity<sup>1</sup>, whereas absorption efficiency  
139 values modeled from uptake rates measured in laboratory biomagnification studies on both adult- and juvenile rainbow trout show  
140 dietary absorption efficiency increases with hydrophobicity<sup>5,6</sup>. Thus, empirical values from these laboratory studies are used in this  
141 current study.

142  $E_D$  for juvenile rainbow trout was estimated by the experimental study authors by fitting growth-corrected fish  
143 concentration data to a kinetic rate equation for constant dietary exposure. Reported values therefore may reflect potential  
144 measurement errors for fish and food concentrations, experimental and model assumption errors, and statistical artefacts of  
145 averaging across natural variability in experimental values. This may include factors like the assumption of a steady feeding rate, the  
146 assumption that 90% of steady state was reached during the experiment, and growth rate-correction for fish concentrations.  
147 Reported assimilation efficiencies were greater than 100% (i.e.  $E_D > 1$ ) for the C8 PFSA and C10-13 PFCAs, which is not physically  
148 possible. In this study,  $E_D$  values were set at 1 when assimilation efficiencies were greater than 100%. Although these  $E_D$  values  
149 likely contain some error, we use them as reported in our biomagnification model, because our model relies on many of the same  
150 inputs and assumptions as the model used to estimate  $E_D$  (i.e. fish concentrations, food concentrations, feeding rate). By using these

151 parameters together, we may correct for co-occurring errors, while still accurately reflecting measured biomagnification and  
152 depuration rates that we then attribute to specific tissue partitioning and elimination mechanisms, respectively.

153 Other studies corroborate the overall finding that dietary assimilation efficiencies for PFAAs in fish are high. Assimilation  
154 efficiencies for adult trout more physically plausible, but still high ( $> 0.1$ ) compared to branchial assimilation efficiencies. These  
155 values are used in the current study for the model application to field food web data. High dietary assimilation efficiencies compared  
156 even to neutral POPs (i.e.  $> 0.5$ ) have also been assumed in other toxicokinetic models of PFAS uptake, such as in humans<sup>21,22</sup>. In  
157 each of these studies, high assimilation efficiencies have been attributed to enterohepatic recirculation.

158

159

160

161 **Section 4. Parameterization of the controlled laboratory study model applications for PFAAs**

162

163 **Table S4a. Biotic state variables**

164

| Parameter       | Description                                  | Value                                                         |
|-----------------|----------------------------------------------|---------------------------------------------------------------|
| $W_B$           | Weight (kg)                                  | 7.3 x 10 <sup>-3</sup> (BCF)<br>2.54 x 10 <sup>-3</sup> (BMF) |
| $m_o$           | Fraction of respiration from overlying water | 1                                                             |
| $u_{NB}$        | Neutral lipid fraction in the gut            | 0.04                                                          |
| $u_{LB}$        | Phospholipid fraction in the gut             | 0.01                                                          |
| $u_{PB}$        | Binding protein fraction in the gut          | 0.003                                                         |
| $u_{OB}$        | NLOM fraction in the gut                     | 0.15                                                          |
| $u_{WB}$        | Water fraction in the gut                    | 0.797                                                         |
| $\varepsilon_N$ | Neutral lipid absorption efficiency          | 0.92                                                          |
| $\varepsilon_L$ | Phospholipid absorption efficiency           | 0.92                                                          |
| $\varepsilon_P$ | Protein absorption efficiency                | 0.92                                                          |
| $\varepsilon_O$ | NLOM absorption efficiency                   | 0.6                                                           |
| $\varepsilon_W$ | Water absorption efficiency                  | 0.7                                                           |
| GRF             | Growth rate factor                           | -- <sup>a</sup>                                               |

165 a – Growth rate was already accounted for in the reported uptake values. Therefore, growth dilution was not included as an  
166 elimination pathway in these models.

167

168 **Table S4b. Environmental state variables**

| Parameter | Description                                 | Value          | Units |
|-----------|---------------------------------------------|----------------|-------|
| $C_{ox}$  | Dissolved oxygen concentration              | 10             | mg/L  |
| $T$       | Temperature                                 | 12             | °C    |
| pH        | pH                                          | 7              |       |
| $\phi$    | Fraction of chemical in the dissolved phase | 1 <sup>a</sup> |       |

169 a – Particulate organic matter in the laboratory study was assumed to be negligible, and therefore 100% of the measured exposure  
170 concentration in water was estimated to be in the dissolved phase.

171

172

173 **Table S4c. Diet composition**

174

| <b>Parameter</b> | <b>Description</b>                  | <b>Values</b> |
|------------------|-------------------------------------|---------------|
| $v_{ND}$         | Neutral lipid fraction in the gut   | 0.012         |
| $v_{LD}$         | Phospholipid fraction in the gut    | 0.003         |
| $v_{PD}$         | Binding protein fraction in the gut | 0             |
| $v_{OD}$         | NLOM fraction in the gut            | 0.15          |
| $v_{WD}$         | Water fraction in the gut           | 0.835         |

175 1 – Following Armitage et al. 2013<sup>2</sup>

176

177

178 Section 5. Parameterization of the Gironde Estuary field study model application

179

180 Table S5a. Biotic state variables

181

|                 | Phyto-<br>plankton | Invertebrates        |                      |                      |                      |                      |                      | Fish                 |                      |                      |                      |                      |                      |
|-----------------|--------------------|----------------------|----------------------|----------------------|----------------------|----------------------|----------------------|----------------------|----------------------|----------------------|----------------------|----------------------|----------------------|
|                 | Phy                | Cop                  | Mys                  | Pfs                  | Gam                  | Rag                  | WSh                  | Gob                  | Acy                  | Spr                  | Sol                  | Fln                  | CSb                  |
| $W_B$ (kg)      |                    | $1 \times 10^{-7}$   | $1 \times 10^{-6}$   | $1 \times 10^{-2}$   | $1 \times 10^{-5}$   | $1 \times 10^{-5}$   | $1 \times 10^{-5}$   | $5 \times 10^{-2}$   | $5 \times 10^{-2}$   | $5 \times 10^{-2}$   | 0.15                 | 0.15                 | 0.2                  |
| $m_o$           | 1                  | 1                    | 0.95                 | 0.5                  | 1                    | 1                    | 1                    | 1                    | 1                    | 1                    | 1                    | 1                    | 1                    |
| $u_{NB}$        | 0.02               | 0.02                 | 0.02                 | 0.02                 | 0.02                 | 0.02                 | 0.02                 | 0.04                 | 0.04                 | 0.04                 | 0.04                 | 0.04                 | 0.04                 |
| $u_{LB}$        | 0.01               | 0.01                 | 0.01                 | 0.01                 | 0.01                 | 0.01                 | 0.01                 | 0.01                 | 0.01                 | 0.01                 | 0.01                 | 0.01                 | 0.01                 |
| $u_{PB}$        | 0                  | 0.001                | 0.001                | 0.001                | 0.001                | 0.001                | 0.001                | 0.003                | 0.003                | 0.003                | 0.003                | 0.003                | 0.003                |
| $u_{OB}^1$      | 0.15               | 0.15                 | 0.15                 | 0.15                 | 0.15                 | 0.15                 | 0.15                 | 0.15                 | 0.15                 | 0.15                 | 0.15                 | 0.15                 | 0.15                 |
| $u_{WB}$        | 0.82               | 0.819                | 0.819                | 0.819                | 0.819                | 0.819                | 0.819                | 0.797                | 0.797                | 0.797                | 0.797                | 0.797                | 0.797                |
| $\varepsilon_N$ |                    | 0.75                 | 0.75                 | 0.75                 | 0.75                 | 0.75                 | 0.75                 | 0.92                 | 0.92                 | 0.92                 | 0.92                 | 0.92                 | 0.92                 |
| $\varepsilon_L$ |                    | 0.75                 | 0.75                 | 0.75                 | 0.75                 | 0.75                 | 0.75                 | 0.92                 | 0.92                 | 0.92                 | 0.92                 | 0.92                 | 0.92                 |
| $\varepsilon_P$ |                    | 0.75                 | 0.75                 | 0.75                 | 0.75                 | 0.75                 | 0.75                 | 0.92                 | 0.92                 | 0.92                 | 0.92                 | 0.92                 | 0.92                 |
| $\varepsilon_O$ |                    | 0.6                  | 0.6                  | 0.6                  | 0.6                  | 0.6                  | 0.6                  | 0.6                  | 0.6                  | 0.6                  | 0.6                  | 0.6                  | 0.6                  |
| $\varepsilon_W$ |                    | 0.55                 | 0.55                 | 0.55                 | 0.55                 | 0.55                 | 0.55                 | 0.55                 | 0.55                 | 0.55                 | 0.55                 | 0.55                 | 0.55                 |
| <b>GRF</b>      | $8 \times 10^{-2}$ | $3.5 \times 10^{-4}$ | $3.5 \times 10^{-4}$ | $3.5 \times 10^{-4}$ | $3.5 \times 10^{-4}$ | $3.5 \times 10^{-4}$ | $3.5 \times 10^{-4}$ | $1.4 \times 10^{-3}$ | $1.4 \times 10^{-3}$ | $1.4 \times 10^{-3}$ | $1.4 \times 10^{-3}$ | $1.4 \times 10^{-3}$ | $1.4 \times 10^{-3}$ |

182 1 – This parameter represents organic carbon for phytoplankton and NLOM for all other species. Partitioning to these different  
 183 fractions utilizes different proportionality constants  $\beta$  (see Table S1). The NLOM proportionality constant is estimated to be between  
 184 0.025 and 0.05<sup>2</sup>, while the OC proportionality constant is estimated to be 0.35<sup>1</sup>.

185

186

187

188

189 **Table S5b. Environmental state variables**

| Parameter | Description                                              | Value    |      | Units    |
|-----------|----------------------------------------------------------|----------|------|----------|
| $C_{ox}$  | Dissolved oxygen concentration                           | 7.5      |      | mg/L     |
| $T$       | Temperature                                              | 12       |      | °C       |
| pH        | pH                                                       | 8        |      | unitless |
| $OCS$     | Organic carbon content in sediment                       | 0.0215   |      | kg/L     |
| $\phi$    | Fraction of chemical in the dissolved phase <sup>a</sup> | C6 PFSA  | 0.92 | unitless |
|           |                                                          | C8 PFSA  | 0.4  |          |
|           |                                                          | C8 PFCA  | 0.8  |          |
|           |                                                          | C9 PFCA  | 0.6  |          |
|           |                                                          | C10 PFCA | 0.35 |          |
|           |                                                          | C11 PFCA | 0.25 |          |

190 a – Fraction in the dissolved phase based on empirical values reported in the Gironde Estuary system (see Figure 3)<sup>23</sup>.

191

192 **Table S5c. Diet Table, Gironde Estuary**

193

|            | Sed | Phy  | Cop   | Mys   | Pfs | Gam  | Rag   | WSh   | Gob | Acy   | Spr | Sol   | Fln | CSb |
|------------|-----|------|-------|-------|-----|------|-------|-------|-----|-------|-----|-------|-----|-----|
| <b>Phy</b> | 0   |      |       |       |     |      |       |       |     |       |     |       |     |     |
| <b>Cop</b> | 0   | 1    |       |       |     |      |       |       |     |       |     |       |     |     |
| <b>Mys</b> | 0.1 | 0.45 | 0.45  |       |     |      |       |       |     |       |     |       |     |     |
| <b>Pfs</b> | 0.3 | 0.65 | 0.05  | 0     |     |      |       |       |     |       |     |       |     |     |
| <b>Gam</b> | 0.3 | 0.35 | 0.35  | 0     | 0   |      |       |       |     |       |     |       |     |     |
| <b>Rag</b> | 0.9 | 0.05 | 0.05  | 0     | 0   | 0    |       |       |     |       |     |       |     |     |
| <b>WSh</b> | 0   | 0.3  | 0.3   | 0.4   | 0   | 0    | 0     |       |     |       |     |       |     |     |
| <b>Gob</b> | 0   | 0.01 | 0.09  | 0.52  | 0   | 0.18 | 0.09  | 0.11  |     |       |     |       |     |     |
| <b>Acy</b> | 0   | 0    | 0.8   | 0.2   | 0   | 0    | 0     | 0     | 0   |       |     |       |     |     |
| <b>Spr</b> | 0   | 0.05 | 0.995 | 0     | 0   | 0    | 0     | 0     | 0   | 0     |     |       |     |     |
| <b>Sol</b> | 0   | 0    | 0     | 0     | 0   | 0.01 | 0.95  | 0.04  | 0   | 0     | 0   |       |     |     |
| <b>Fln</b> | 0   | 0.1  | 0     | 0.001 | 0   | 0.06 | 0.903 | 0.026 | 0   | 0     | 0   | 0     |     |     |
| <b>CSb</b> | 0   | 0    | 0.003 | 0.007 | 0   | 0.32 | 0.01  | 0.472 | 0   | 0.047 | 0   | 0.141 | 0   |     |

194



195 **Section 6. PFAA alternatives BCF model application – parameterization and model results**

196

197 Dietary uptake and elimination were not included in this calculation. Feed was not spiked with the contaminant, so dietary uptake  
 198 should be negligible, affected only by partitioning into the feed from aqueous solution. Fecal elimination is expected to be minimal,  
 199 based on results from the bioconcentration model for PFAAs (<1% of total elimination). Tissue composition and absorption  
 200 efficiencies are the same as values in the PFAA model applications (Table S4a).

201

202 **Table S6a. 9CI-PF3ONS BCF model parameterization & results**

| Parameter                                      | Value                 | Units           | References or Source                         |
|------------------------------------------------|-----------------------|-----------------|----------------------------------------------|
| <b>Chemical parameters</b>                     |                       |                 |                                              |
| Log Dmw                                        | 5.14                  |                 | <sup>24</sup>                                |
| Log Dpw                                        | 5.14                  |                 | <sup>24</sup>                                |
| Log Kow                                        | 5.24                  |                 | <sup>25</sup> (KowWIN 1.69)                  |
| Log Dow                                        | 2.14                  |                 | Calculated following Ref 2                   |
| Log Dbw                                        | 3.25                  |                 | Calculated, Table S1                         |
| Ew                                             | 0.015                 |                 | Approximated from $k_1$ in Ref <sup>26</sup> |
| <b>Organism &amp; Environmental parameters</b> |                       |                 |                                              |
| Wb                                             | 0.0004                | kg              | <sup>27,28</sup> ; a                         |
| Cox                                            | 7.44                  | mg/L            | b                                            |
| T                                              | 25                    | C               | <sup>26</sup>                                |
| <b>Calculated rates</b>                        |                       |                 |                                              |
| Gv                                             | 1.16                  | L/d             | Calculated (see Table S1)                    |
| k1                                             | 43.6                  | L/kg/d          | Calculated (see Table S1)                    |
| k2                                             | $2.42 \times 10^{-2}$ | d <sup>-1</sup> | Calculated (see Table S1)                    |
| kg                                             | $2.5 \times 10^{-2}$  | d <sup>-1</sup> | Estimated from Figure 4 <sup>26</sup>        |
| <b>Bioconcentration factor</b>                 |                       |                 |                                              |
| Log BCF (Model)                                | 2.95                  | L/kg            | $k_1 / (k_2 + k_g)$                          |
| Log BCF (Obs)                                  | 3.06                  | L/kg            | <sup>26</sup>                                |
| <b>Model Bias</b>                              | <b>0.77</b>           |                 |                                              |

203 a – Weight is not reported. Value estimated from other studies of 2-month-old Chinese rare minnow.

204 b – Oxygen content was not reported. Assumed 90% oxygen saturation.

205

206 **Table S6b. HFPO-DA BCF model parameterization & results**

| Parameter                                      | Value                   | Units           | References or Source                                               |
|------------------------------------------------|-------------------------|-----------------|--------------------------------------------------------------------|
| <b>Chemical parameters</b>                     |                         |                 |                                                                    |
| Log Dmw                                        | 2.41                    |                 | <sup>24</sup>                                                      |
| Log Dpw                                        | 3.19                    |                 | <sup>24</sup>                                                      |
| Log Kow                                        | 3.36                    |                 | <sup>25</sup> (KowWIN v1.69)                                       |
| Log Dow                                        | 0.26                    |                 | Calculated following Ref 2                                         |
| Log Dbw                                        | 0.86                    |                 | Calculated, Table S1                                               |
| Ew                                             | 6 x 10 <sup>-5</sup>    |                 | Approximated from k <sub>1</sub> <sup>a</sup> in Ref <sup>29</sup> |
| <b>Organism &amp; Environmental parameters</b> |                         |                 |                                                                    |
| Wb                                             | 0.005                   | kg              | <sup>29</sup>                                                      |
| Cox                                            | 8.3                     | mg/L            | <sup>29</sup>                                                      |
| T                                              | 27                      | C               | <sup>29</sup>                                                      |
| <b>Calculated rates</b>                        |                         |                 |                                                                    |
| Gv                                             | 5.73                    | L/d             | Calculated (see Table S1)                                          |
| k1                                             | 5.93 x 10 <sup>-1</sup> | L/kg/d          | Calculated (see Table S1)                                          |
| k2                                             | 8.11 x 10 <sup>-3</sup> | d <sup>-1</sup> | Calculated (see Table S1)                                          |
| kg                                             | 7.24 x 10 <sup>-3</sup> | d <sup>-1</sup> | Calculated <sup>1</sup>                                            |
| <b>Bioconcentration factor</b>                 |                         |                 |                                                                    |
| Log BCF (Model)                                | 0.587                   | L/kg            | k1 / (k2 + kg)                                                     |
| Log BCF (Obs)                                  | 0.591                   | L/kg            | <sup>29</sup> (see Table S6c)                                      |
| Model Bias                                     | <b>1.01</b>             |                 |                                                                    |

207 a – This is the same method that was used for PFAAs. Uptake rates were reported separately for different organs, so a whole-body uptake rate  
208 was estimated using a calculation analogous to the one used to calculate a whole-body BCF (Table S6c), using the same organ volume  
209 distribution shown in Table S6c.

210

211

212

213 Bioconcentration factors for HFPO-DA were reported for the carcass, fillet, plasma, and liver. A whole-body concentration factor was calculated  
 214 based on estimated organ sizes, as estimated for the fish modeled by Ng & Hungerbuhler<sup>17</sup>, and assuming approximately equal densities (1  
 215 g/mL) across organs. Details of this calculation are shown in the table below.

216

217 **Table S6c. HFPO-DA whole body BCF estimation**

| Tissue                               | Observed BCF <sup>29</sup> | Organ volume (mL) <sup>a</sup> | Organ % fraction of whole body <sup>a</sup> |
|--------------------------------------|----------------------------|--------------------------------|---------------------------------------------|
| Fillet                               | 2.200                      | 3.7                            | 46.25%                                      |
| Plasma                               | 2.967                      | 0.017 <sup>b</sup>             | 2.06%                                       |
| Liver                                | 0.262                      | 0.091                          | 1.14%                                       |
| Carcass                              | 5.583                      |                                | 50.55% <sup>c</sup>                         |
| <b>Whole Body BCF<sup>d</sup></b>    | <b>3.904</b>               |                                |                                             |
| <b>Whole Body logBCF<sup>d</sup></b> | <b>0.591</b>               |                                |                                             |

218 a – Compiled by Ng & Hungerbuhler<sup>17</sup>, Table S1 for an 8 g fish

219 b – Assumes blood plasma is approximately 55% of whole blood volume

220 c – Calculated as the remaining fraction

221 d – Calculated as a volume-weighted average

222

223 **Section 7. Estimation of fish protein content**

224

225 Albumin volume % calculation

226 1. *Calculate whole blood volume percent in fish* – given the volumes and body weight percent for each organ tissue modeled in Ng  
227 & Hungerbuhler<sup>17</sup> (Table S1, assuming a similar density between organs), the volume of a whole fish is approximately 7.97 mL.  
228 Given a blood volume of 0.3 mL, blood is approximately 3.8% of the total body volume, similar to other literature values  
229 (Karlssonorrgrén et al. 1985 as cited in Shi et al.<sup>30</sup>).

230

231 2. *Estimate albumin content in whole blood* – Albumin content in fish blood can be estimated based on estimated albumin content  
232 in human blood. Human blood has an albumin concentration of about 30-50 g/L and a density of about 1060 g/L; therefore,  
233 albumin makes up approximately 3.3-4.7% of human blood, Albumin is estimated to make up about 65% of all proteins in human  
234 blood, but varies from 0-60% across the several fish species that have been measured<sup>13,14</sup>. In rainbow trout, the species studied  
235 in lab-based evaluation dataset in the current study, the albumin concentration has been measured at about 13.8 +/- 0.5 g/L, or  
236 about 38% of total protein (35.9 +/- 1.3 g/L)<sup>31</sup>; similar albumin:total protein ratios have been observed in a range of species,  
237 including rainbow trout, channel catfish, tilapia, striped bass, salmon, three species of carp<sup>14,32,33</sup>. Assuming a similar ratio  
238 between total protein content and blood density in humans and fish, we would expect the albumin contribution to whole blood  
239 for these common fish species to be about two-thirds of the value estimated for human blood.

240

241 Albumin content in fish can be highly variable among species, and or the same species under varying environmental conditions  
242 or life stages. It is also possible that some species that do not express albumin can instead express other proteins serving similar  
243 functions, and that can also bind PFAAs. For example, Zhong et al.<sup>12</sup> report PFAA binding affinities for “fish blood proteins” in  
244 common carp, which have been reported not to express albumin<sup>13</sup>, but do express lipoproteins that serve similar functions. The  
245 lipoprotein:protein ratio measured in one carp study was also in the 40% range, although it was noted that the lipoprotein  
246 concentration varied seasonally and based on diet<sup>34</sup>. This variability contributes to making albumin volume percent, or binding  
247 protein percent more generally, one of the more uncertain parameters in the current model.

248

249 3. *Blood albumin % in whole body* – Using an approximate maximum albumin content in whole blood of 3% and a blood volume  
250 percent of 3.8%, we calculate that albumin in the blood is about 0.11% of total body weight.

251

252 4. *Calculate albumin % distribution in blood* – Based on values used to parameterize the Ng & Hungerbuhler<sup>17</sup> PBTK  
253 bioconcentration model for PFAAs, the estimated fraction of albumin in whole blood is 75.5% (see Table S6a). In contrast, based

254 on a broader literature review, Ng & Hungerbuhler<sup>35</sup> state that between “30-40% of the total albumin pool in an organism is  
 255 generally believed to be present in the plasma, with the remainder distributed in the extravascular fraction.” While this estimate  
 256 is not specifically made for fish, it would include albumin present in other tissue compartments not included in the Ng &  
 257 Hungerbuhler model.

258

259 **Table S7a. Calculation of protein content in blood and other tissues in a model fish.** Protein concentration and tissue volumes were  
 260 taken from Ng & Hungerbuhler<sup>17</sup> (Tables S1, S2 & S5). These values were used to parameterize a PBTK model that was evaluated  
 261 against the same laboratory bioconcentration study data used in the current study.

|                                             | Ng & Hungerbuhler 2013 model values |                    |                        |                                              |                                             |
|---------------------------------------------|-------------------------------------|--------------------|------------------------|----------------------------------------------|---------------------------------------------|
|                                             | Protein Concentration (mmol/L)      | Tissue Volume (mL) | Protein content (nmol) | % of total protein content (albumin or FABP) | % of total protein content (albumin + FABP) |
| <b>Albumin</b>                              |                                     |                    |                        |                                              |                                             |
| Blood                                       | 0.2                                 | 0.3                | 60                     | 75.5%                                        | 71.4%                                       |
| Liver Fluid                                 | 0.1                                 | 0.026              | 2.6                    | 3.3%                                         |                                             |
| Kidney Fluid                                | 0.1                                 | 0.045              | 4.5                    | 5.7%                                         |                                             |
| Muscle Fluid                                | 0.06                                | 0.20               | 12                     | 5.1%                                         |                                             |
| Adipose Fluid                               | 0.03                                | 0.012              | 0.36                   | 0.5%                                         |                                             |
| <i>Total Albumin</i>                        |                                     |                    | 79.46                  | 100%                                         |                                             |
| <b>Fatty Acid Binding Protein</b>           |                                     |                    |                        |                                              |                                             |
| Liver Tissue                                | 0.05                                | 0.091              | 4.55                   | 100%                                         | 5.4%                                        |
| <b>Albumin + Fatty Acid Binding Protein</b> |                                     |                    |                        |                                              |                                             |
| <i>Total Albumin + L-FABP</i>               |                                     |                    | 84.01                  | 100%                                         |                                             |

262

263 5. *Total albumin % in whole body* – If albumin in blood is about 75.5% of total albumin in the body (60 nmol / 79.46 nmol = 75.5%),  
 264 then we can calculate that all albumin in the body makes up about 0.15% of total body weight (albumin in blood = 0.11% of total  
 265 body weight; 0.11% / 0.755 = 0.146%). On the other extreme, if we assume blood albumin is only 30% of total albumin, then we  
 266 calculate a total albumin volume percent in the body of about 0.38% (0.11% / 0.30 = 0.38%).

267

268 In the current model, we use an albumin protein volume percent of 0.3% to represent an upper end estimate of protein contribution  
269 to PFAA partitioning to tissues. This is similar to the estimated blood protein volume content of 0.27% independently estimated by  
270 Shi et al.<sup>30</sup> (adapted from Nichols et al. 1990).

271

#### 272 *Liver fatty acid binding protein*

273 As discussed in Section 3, L-FABP was not included in this model because its estimated total contribution to protein binding is  
274 negligible compared to uncertainty in the albumin volume percent parameter. Protein binding studies using mammalian proteins  
275 suggest that PFAAs bind more weakly to L-FABP than albumin, but in this calculation we conservatively assume similar partitioning to  
276 both proteins. Based on the protein abundance estimated in Table S7a, the addition of L-FABP increases the total protein binding  
277 (albumin + L-FABP) pool by approximately 6% ( $4.55 \text{ nmoL} / 84.01 \text{ nmoL} = 0.057$ ). This in turn increases our estimate of the fraction of  
278 total body volume made up of binding proteins by 6%, from 0.15%-0.38% (albumin only) to 0.16%-0.40%. Our current estimate of  
279 binding protein content in the model (0.3%) remains well within this revised range of albumin + L-FABP content. Therefore, while L-  
280 FABP is not explicitly included as a separate compartment in this model, it could be considered accounted for within the  
281 compartment currently attributed to albumin proteins alone.

282

283

284 **Section 8. Renal elimination rate calculation**

285

286 **Table S8.** Renal elimination rate calculation

287

|                                                      | C6 PFSA            | C8 PFSA            | C8 PFCA            | C9 PFCA            | C10 PFCA           | C11 PFCA       | Reference                 |
|------------------------------------------------------|--------------------|--------------------|--------------------|--------------------|--------------------|----------------|---------------------------|
| Renal clearance ( $s^{-1}$ )                         | 0.023              | 0.050              | 0.029              | 0.050              | 0.049              | 0.062          | 17,36                     |
| Renal reabsorption ( $s^{-1}$ )                      | 0.004              | 0.037              | 0.014              | 0.037              | 0.042              | 0.059          | 17,36                     |
| Renal clearance-to-reabsorption ratio                | 5.88 <sup>a</sup>  | 1.35 <sup>a</sup>  | 2.08               | 1.35 <sup>a</sup>  | 1.17               | 1.05           |                           |
| Renal-to-total (renal + branchial) elimination ratio |                    | 0.21               | 0.92               |                    |                    |                | 37,38                     |
| <b>Calculate renal elimination</b>                   |                    |                    |                    |                    |                    |                |                           |
| Branchial elimination ( $d^{-1}$ )                   | 0.003              | 0.051              | 0.006              | 0.017 <sup>b</sup> | 0.031              | 0.058          | <sup>3</sup> , This study |
| Renal elimination ( $d^{-1}$ )                       | 0.315 <sup>d</sup> | 0.014 <sup>c</sup> | 0.069 <sup>c</sup> | 0.014 <sup>d</sup> | 0.007 <sup>d</sup> | 0 <sup>d</sup> | This study (Figure S7)    |
| Renal-to-total elimination ratio                     | 0.99               | 0.21               | 0.92               | 0.44               | 0.19               | 0              | This study                |

288 a – Values for PFSA are based on renal clearance and reabsorption rates calculated for the same perfluorinated chain-length PFCA. Values for the C9  
 289 PFCA are not reported in Ref. 1 but are reported for C8 PFSA and are assumed to be the same for these two compounds.

290 b – Calculated using uptake rate from a linear regression between PFCA chain length and uptake rate

291 c – Calculated using measured renal-to-total elimination ratio and modeled branchial elimination rates

292 d – Calculated using linear regression (see Figure S7)

293

294

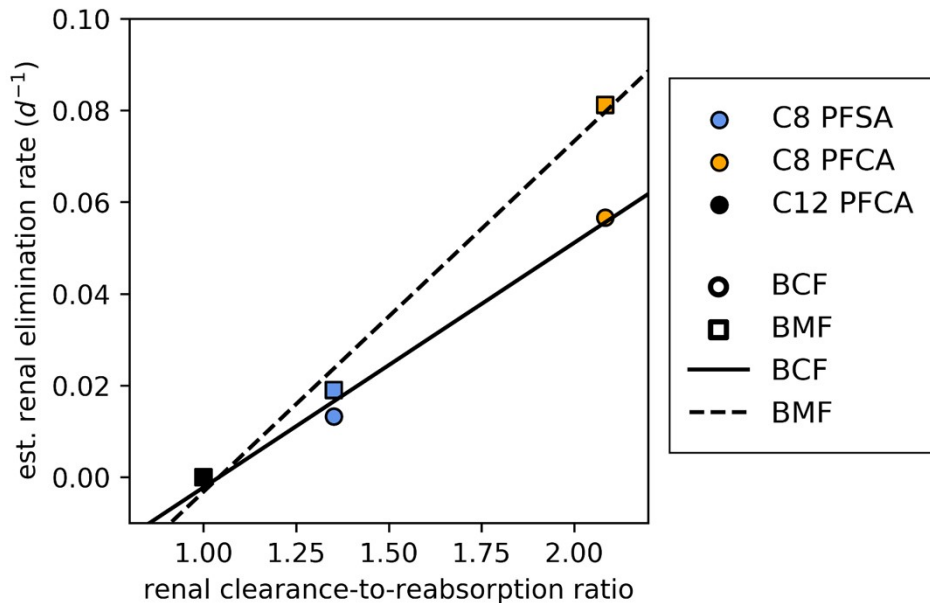

295  
296

297 **Figure S8. Estimation of renal elimination rates from linear regression between renal elimination rate and renal clearance-to-**  
 298 **reabsorption ratio for the C8 PFSA, C8 PFCA and C12 PFCA.** Linear regressions were calculated separately for the bioconcentration  
 299 (circles, solid line,  $R^2 = 0.98$ ) and biomagnification (squares, dotted line,  $R^2 = 0.98$ ) datasets. For the remaining PFAAs, renal  
 300 elimination rates for fish in the bioconcentration and biomagnification studies were estimated from the linear regression  
 301 relationships based on renal clearance-to-reabsorption ratios calculated from data reported by Weaver et al.<sup>36</sup> and Ng &  
 302 Hungerbuhler<sup>35</sup>. Further details of this calculation are described in Table S7 and the main text.

303  
304  
305  
306



307 Section 9. Sensitivity Analysis

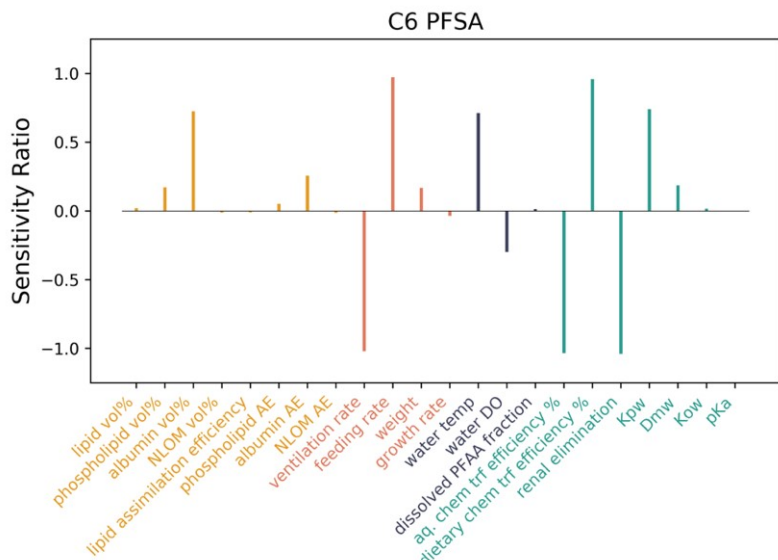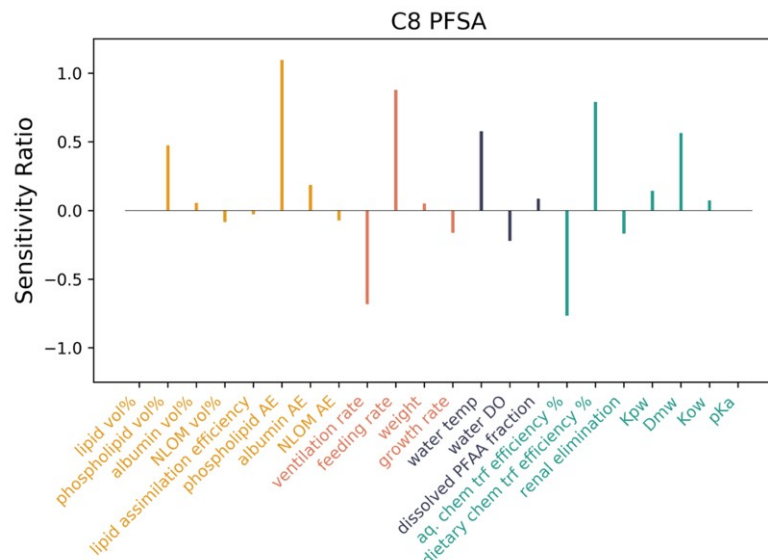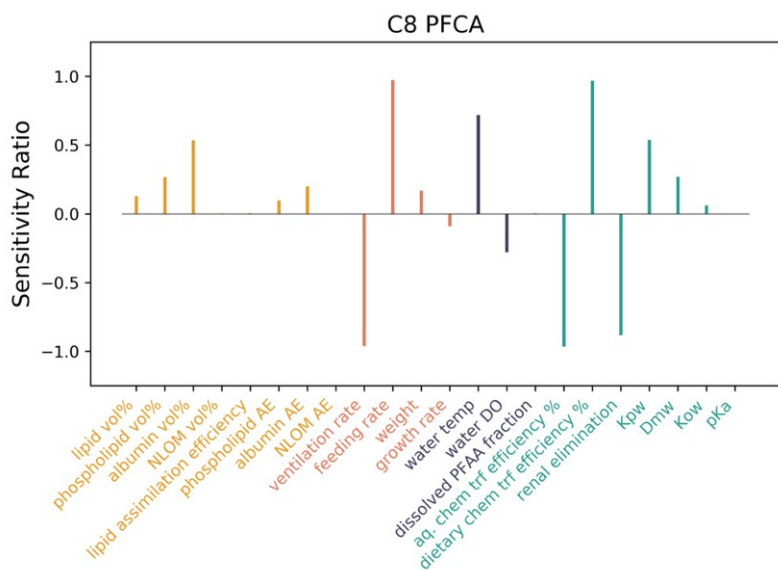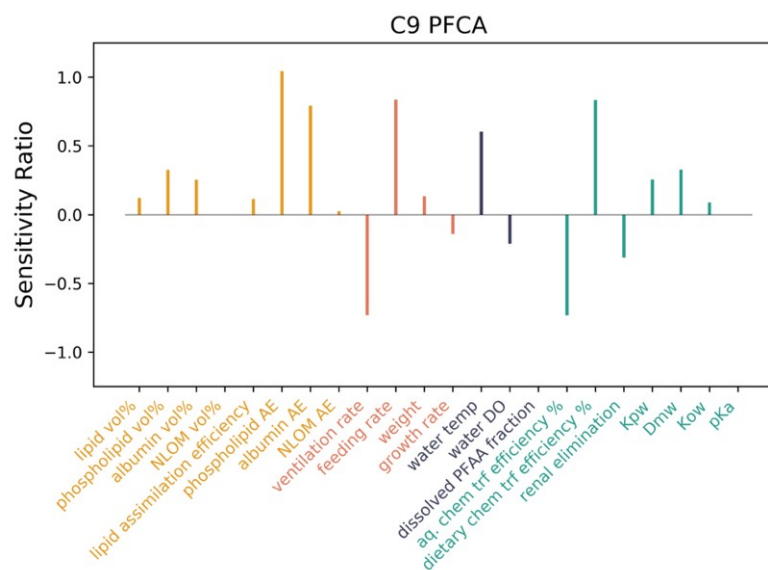

308  
309

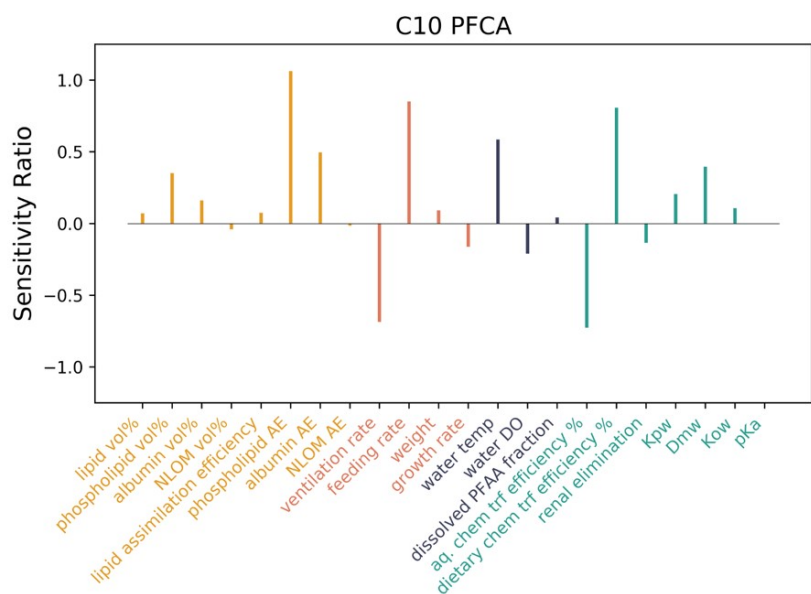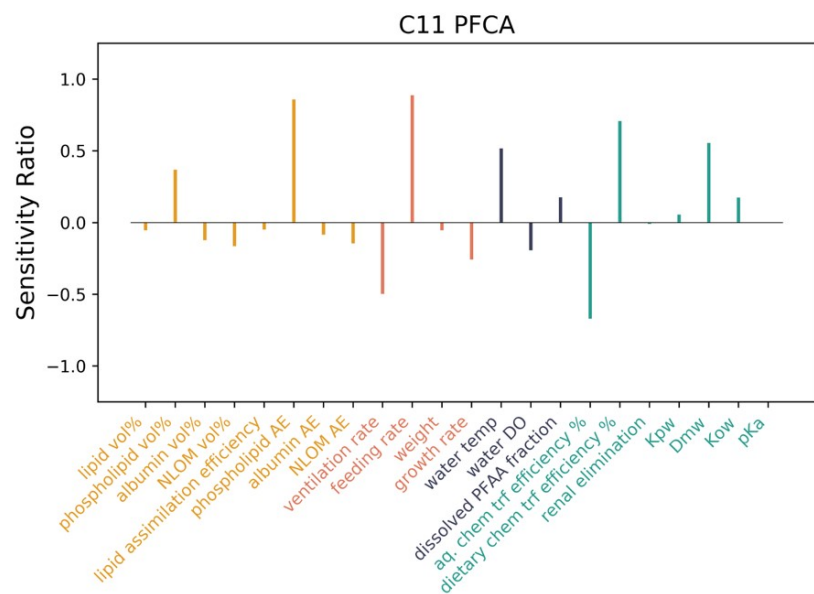

310  
311

312 **Figure S9.** Sensitivity ratios for key parameters calculated using a representative fish species (Sole) from the Gironde Estuary system.  
313 Parameters evaluated include organism parameters (yellow; tissue composition and assimilation efficiencies), bioenergetics  
314 (orange), environmental characteristics (purple), and chemical-specific physiochemical properties or mechanisms (green).  
315

316 Section 10. Influence of dietary exposure on modeled food web concentrations

317

318

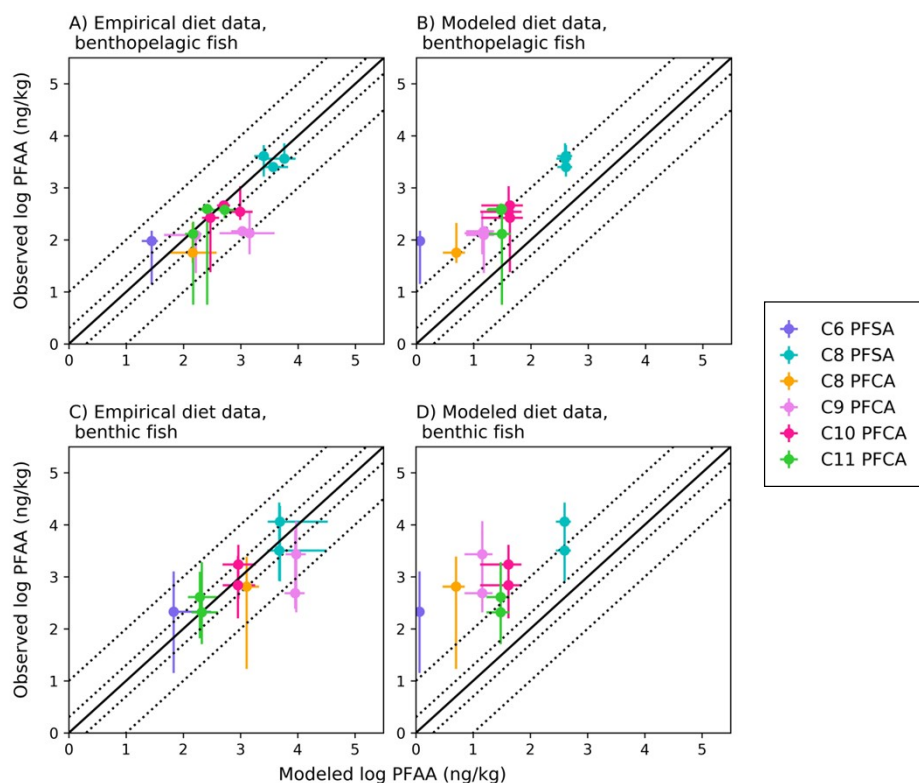

319

320 **Figure S10.** Comparison of model-predicted PFAA concentrations for both benthopelagic and fully benthic fish from the Gironde  
321 Estuary, France, simulated using observed prey data or no dietary uptake. The solid black line represents a 1:1 line (perfect  
322 agreement), while the dotted lines represent a factor of two and a factor of 10 difference between modeled and observed values.

323 Circles show modeled values based on median water/sediment/prey concentrations and error bars represent minimum and maximum  
324 reported exposure concentrations. Observed variability likely includes variability not included in the model, such as variability in  
325 organism or environmental parameters. Results show that dietary uptake plays an important role in total exposures for all fish, but has  
326 greatest influence in the benthic food web.

327

328 **References**

329

- 330 (1) Arnot, J. A.; Gobas, F. A. P. C. A Food Web Bioaccumulation Model for Organic Chemicals in Aquatic Ecosystems. *Environ.*  
331 *Toxicol. Chem.* **2004**, *23* (10), 2343–2355. <https://doi.org/10.1897/03-438>.
- 332 (2) Armitage, J. M.; Arnot, J. A.; Wania, F.; Mackay, D. Development and Evaluation of a Mechanistic Bioconcentration Model for  
333 Ionogenic Organic Chemicals in Fish. *Environ. Toxicol. Chem.* **2013**, *32* (1), 115–128. <https://doi.org/10.1002/etc.2020>.
- 334 (3) Martin, J. W.; Mabury, S. A.; Solomon, K. R.; Muir, D. C. G. Bioconcentration and Tissue Distribution of Perfluorinated Acids in  
335 Rainbow Trout (*Oncorhynchus Mykiss*). *Environ. Toxicol. Chem.* **2003**, *22* (1), 196–204.  
336 <https://doi.org/10.1002/etc.5620220126>.
- 337 (4) Ebert, A.; Allendorf, F.; Berger, U.; Goss, K.-U.; Ulrich, N. Membrane/Water Partitioning and Permeabilities of Perfluoroalkyl  
338 Acids and Four of Their Alternatives and the Effects on Toxicokinetic Behavior. *Environ. Sci. Technol.* **2020**, *acs.est.0c00175*.  
339 <https://doi.org/10.1021/acs.est.0c00175>.
- 340 (5) Martin, J. W.; Mabury, S. A.; Solomon, K. R.; Muir, D. C. G. Dietary Accumulation of Perfluorinated Acids in Juvenile Rainbow  
341 Trout (*Oncorhynchus Mykiss*). *Environ. Toxicol. Chem.* **2003**, *22* (1), 189–195. <https://doi.org/10.1002/etc.5620220125>.
- 342 (6) Goeritz, I.; Falk, S.; Stahl, T.; Schäfers, C.; Schlechtriem, C. Biomagnification and Tissue Distribution of Perfluoroalkyl  
343 Substances (PFASs) in Market-Size Rainbow Trout (*Oncorhynchus Mykiss*). *Environ. Toxicol. Chem.* **2013**, *32* (9), 2078–2088.  
344 <https://doi.org/10.1002/etc.2279>.
- 345 (7) Droge, S. T. J. Membrane–Water Partition Coefficients to Aid Risk Assessment of Perfluoroalkyl Anions and Alkyl Sulfates.  
346 *Environ. Sci. Technol.* **2019**, *53* (2), 760–770. <https://doi.org/10.1021/acs.est.8b05052>.
- 347 (8) MacManus-Spencer, L. A.; Tse, M. L.; Hebert, P. C.; Bischel, H. N.; Luthy, R. G. Binding of Perfluorocarboxylates to Serum  
348 Albumin: A Comparison of Analytical Methods. *Anal. Chem.* **2010**, *82* (3), 974–981. <https://doi.org/10.1021/ac902238u>.
- 349 (9) Bischel, H. N.; MacManus-Spencer, L. A.; Zhang, C.; Luthy, R. G. Strong Associations of Short-Chain Perfluoroalkyl Acids with  
350 Serum Albumin and Investigation of Binding Mechanisms. *Environ. Toxicol. Chem.* **2011**, *30* (11), 2423–2430.  
351 <https://doi.org/10.1002/etc.647>.
- 352 (10) Allendorf, F.; Berger, U.; Goss, K.-U.; Ulrich, N. Partition Coefficients of Four Perfluoroalkyl Acid Alternatives between Bovine  
353 Serum Albumin (BSA) and Water in Comparison to Ten Classical Perfluoroalkyl Acids. *Environ. Sci. Process. Impacts* **2019**, *21*  
354 (11), 1852–1863. <https://doi.org/10.1039/C9EM00290A>.
- 355 (11) Alesio, J. L.; Slitt, A.; Bothun, G. D. Critical New Insights into the Binding of Poly- and Perfluoroalkyl Substances (PFAS) to  
356 Albumin Protein. *Chemosphere* **2022**, *287*, 131979. <https://doi.org/10.1016/j.chemosphere.2021.131979>.

- 357 (12) Zhong, W.; Zhang, L.; Cui, Y.; Chen, M.; Zhu, L. Probing Mechanisms for Bioaccumulation of Perfluoroalkyl Acids in Carp  
358 (Cyprinus Carpio): Impacts of Protein Binding Affinities and Elimination Pathways. *Sci. Total Environ.* **2019**, *647*, 992–999.  
359 <https://doi.org/10.1016/j.scitotenv.2018.08.099>.
- 360 (13) Enerstvedt, K. S.; Sydnes, M. O.; Pampanin, D. M. Identification of an Albumin-like Protein in Plasma of Atlantic Cod (*Gadus*  
361 *Morhua*) and Its Biomarker Potential for PAH Contamination. *Heliyon* **2017**, *3* (8).  
362 <https://doi.org/10.1016/j.heliyon.2017.e00367>.
- 363 (14) Sandnes, K.; Lie, O.; Waagbo, R. Normal Ranges of Some Blood Chemistry Parameters in Adult Farmed Atlantic Salmon, *Salmo*  
364 *Salar*. *J. Fish Biol.* **1988**, *32* (1), 129–136. <https://doi.org/10.1111/j.1095-8649.1988.tb05341.x>.
- 365 (15) Zhang, L.; Ren, X.-M.; Guo, L.-H. Structure-Based Investigation on the Interaction of Perfluorinated Compounds with Human  
366 Liver Fatty Acid Binding Protein. *Environ. Sci. Technol.* **2013**, *47* (19), 11293–11301. <https://doi.org/10.1021/es4026722>.
- 367 (16) Chen, Y.-M.; Guo, L.-H. Fluorescence Study on Site-Specific Binding of Perfluoroalkyl Acids to Human Serum Albumin. *Arch.*  
368 *Toxicol.* **2008**, *83* (3), 255. <https://doi.org/10.1007/s00204-008-0359-x>.
- 369 (17) Ng, C. A.; Hungerbühler, K. Bioconcentration of Perfluorinated Alkyl Acids: How Important Is Specific Binding? *Environ. Sci.*  
370 *Technol.* **2013**, *47* (13), 7214–7223. <https://doi.org/10.1021/es400981a>.
- 371 (18) Saarikoski, J.; Lindström, R.; Tyynela, M.; Viluksela, M. 0 - OLD Factors Affecting the Absorption of Phenolics and Carboxylic  
372 Acids in the Guppy (*Poecilia Reticulata*). 16.
- 373 (19) Yang, C.-H.; Glover, K. P.; Han, X. Characterization of Cellular Uptake of Perfluorooctanoate via Organic Anion-Transporting  
374 Polypeptide 1A2, Organic Anion Transporter 4, and Urate Transporter 1 for Their Potential Roles in Mediating Human Renal  
375 Reabsorption of Perfluorocarboxylates. *Toxicol. Sci.* **2010**, *117* (2), 294–302. <https://doi.org/10.1093/toxsci/kfq219>.
- 376 (20) Armitage, J. M.; Erickson, R. J.; Luckenbach, T.; Ng, C. A.; Prosser, R. S.; Arnot, J. A.; Schirmer, K.; Nichols, J. W. Assessing the  
377 Bioaccumulation Potential of Ionizable Organic Compounds: Current Knowledge and Research Priorities. *Environ. Toxicol.*  
378 *Chem.* **2017**, *36* (4), 882–897. <https://doi.org/10.1002/etc.3680>.
- 379 (21) Lorber, M.; Egeghy, P. P. Simple Intake and Pharmacokinetic Modeling to Characterize Exposure of Americans to  
380 Perfluorooctanoic Acid, PFOA. *Environ. Sci. Technol.* **2011**, *45* (19), 8006–8014. <https://doi.org/10.1021/es103718h>.
- 381 (22) Egeghy, P. P.; Lorber, M. An Assessment of the Exposure of Americans to Perfluorooctane Sulfonate: A Comparison of  
382 Estimated Intake with Values Inferred from NHANES Data. *J. Expo. Sci. Environ. Epidemiol.* **2011**, *21* (2), 150–168.  
383 <https://doi.org/10.1038/jes.2009.73>.
- 384 (23) Munoz, G.; Budzinski, H.; Babut, M.; Lobry, J.; Selleslagh, J.; Tapie, N.; Labadie, P. Temporal Variations of Perfluoroalkyl  
385 Substances Partitioning between Surface Water, Suspended Sediment, and Biota in a Macrotidal Estuary. *Chemosphere* **2019**,  
386 *233*, 319–326. <https://doi.org/10.1016/j.chemosphere.2019.05.281>.

- 387 (24) Allendorf, F.; Goss, K.-U.; Ulrich, N. Estimating the Equilibrium Distribution of Perfluoroalkyl Acids and 4 of Their Alternatives in  
388 Mammals. *Environ. Toxicol. Chem.* **2021**, *40* (3), 910–920. <https://doi.org/10.1002/etc.4954>.
- 389 (25) US EPA. *Estimation Programs Interface Suite for Microsoft Windows*; United States Environmental Protection Agency:  
390 Washington, DC, USA, 2022.
- 391 (26) Liu, W.; Yang, J.; Li, J.; Zhang, J.; Zhao, J.; Yu, D.; Xu, Y.; He, X.; Zhang, X. Toxicokinetics and Persistent Thyroid Hormone  
392 Disrupting Effects of Chronic Developmental Exposure to Chlorinated Polyfluorinated Ether Sulfonate in Chinese Rare  
393 Minnow. *Environ. Pollut.* **2020**, *263*, 114491. <https://doi.org/10.1016/j.envpol.2020.114491>.
- 394 (27) Xin, J.; Yan, S.; Hong, X.; Zhang, H.; Zha, J. Environmentally Relevant Concentrations of Carbamazepine Induced Lipid  
395 Metabolism Disorder of Chinese Rare Minnow (*Gobiocypris Rarus*) in a Gender-Specific Pattern. *Chemosphere* **2021**, *265*,  
396 129080. <https://doi.org/10.1016/j.chemosphere.2020.129080>.
- 397 (28) Xin, J.; Yan, S.; Hong, X.; Zhang, H.; Zha, J. Environmentally Relevant Concentrations of Clozapine Induced Lipotoxicity and Gut  
398 Microbiota Dysbiosis in Chinese Rare Minnow (*Gobiocypris Rarus*). *Environ. Pollut.* **2021**, *286*, 117298.  
399 <https://doi.org/10.1016/j.envpol.2021.117298>.
- 400 (29) Siddiqui, S.; Fitzwater, M.; Scarpa, J.; Conkle, J. L. Comparison of Bioconcentration and Kinetics of GenX in *Tilapia Oreochromis*  
401 *Mossambicus* in Fresh and Brackish Water. *Chemosphere* **2022**, *287*, 132289.  
402 <https://doi.org/10.1016/j.chemosphere.2021.132289>.
- 403 (30) Shi, Y.; Vestergren, R.; Nost, T. H.; Zhou, Z.; Cai, Y. Probing the Differential Tissue Distribution and Bioaccumulation Behavior of  
404 Per- and Polyfluoroalkyl Substances of Varying Chain-Lengths, Isomeric Structures and Functional Groups in Crucian Carp.  
405 *Environ. Sci. Technol.* **2018**, *52* (8), 4592–4600. <https://doi.org/10.1021/acs.est.7b06128>.
- 406 (31) Manera, M.; Britti, D. Assessment of Blood Chemistry Normal Ranges in Rainbow Trout. *J. Fish Biol.* **2006**, *69* (5), 1427–1434.  
407 <https://doi.org/10.1111/j.1095-8649.2006.01205.x>.
- 408 (32) Zhang, W.; Liang, G.; Wu, L.; Tuo, X.; Wang, W.; Chen, J.; Xie, P. Why Mammals More Susceptible to the Hepatotoxic  
409 Microcystins than Fish: Evidences from Plasma and Albumin Protein Binding through Equilibrium Dialysis. *Ecotoxicology* **2013**,  
410 *22* (6), 1012–1019. <https://doi.org/10.1007/s10646-013-1086-5>.
- 411 (33) Hrubec, T. C.; Smith, S. A. Differences between Plasma and Serum Samples for the Evaluation of Blood Chemistry Values in  
412 Rainbow Trout, Channel Catfish, Hybrid Tilapias, and Hybrid Striped Bass. *J. Aquat. Anim. Health* **1999**, *11* (2), 116–122.  
413 [https://doi.org/10.1577/1548-8667\(1999\)011<0116:DBPASS>2.0.CO;2](https://doi.org/10.1577/1548-8667(1999)011<0116:DBPASS>2.0.CO;2).
- 414 (34) Nakagawa, H.; Kayama, M.; Asakawa, S. Biochemical Studies on Carp Plasma Protein. I. Isolation and Nature of an Albumin.  
415 *NIPPON SUISAN GAKKAISHI* **1976**, *42* (6), 677–685. <https://doi.org/10.2331/suisan.42.677>.
- 416 (35) Ng, C. A.; Hungerbühler, K. Bioaccumulation of Perfluorinated Alkyl Acids: Observations and Models. *Environ. Sci. Technol.*  
417 **2014**, *48* (9), 4637–4648. <https://doi.org/10.1021/es404008g>.

- 418 (36) Weaver, Y. M.; Ehresman, D. J.; Butenhoff, J. L.; Hagenbuch, B. Roles of Rat Renal Organic Anion Transporters in Transporting  
419 Perfluorinated Carboxylates with Different Chain Lengths. *Toxicol. Sci.* **2010**, *113* (2), 305–314.  
420 <https://doi.org/10.1093/toxsci/kfp275>.
- 421 (37) Consoer, D. M.; Hoffman, A. D.; Fitzsimmons, P. N.; Kosian, P. A.; Nichols, J. W. Toxicokinetics of Perfluorooctanoate (PFOA) in  
422 Rainbow Trout (*Oncorhynchus Mykiss*). *Aquat. Toxicol.* **2014**, *156*, 65–73. <https://doi.org/10.1016/j.aquatox.2014.07.022>.
- 423 (38) Consoer, D. M.; Hoffman, A. D.; Fitzsimmons, P. N.; Kosian, P. A.; Nichols, J. W. Toxicokinetics of Perfluorooctane Sulfonate in  
424 Rainbow Trout ( *Oncorhynchus Mykiss* ): Toxicokinetics of PFOS in Trout. *Environ. Toxicol. Chem.* **2016**, *35* (3), 717–727.  
425 <https://doi.org/10.1002/etc.3230>.  
426
